# Supplementary material for: Impact of Inadequate Number of Lymph Nodes Examined on Survival in Stage II Colon Cancer
Source: PubMed Central journal article supplement (PMC8489731; doi:10.3389/fonc.2021.736678), 2021-09-20
Supplement: DataSheet_1.pdf [file DataSheet_1.pdf]

From 2004 to 2010, patients diagnosed with colon cancer were identified using the NCI SEER\*Stat software (version 8.3.5)

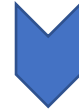

Inclusion criteria: (1). with surgical resection; (2). with active follow-up; (3). without distant metastasis; (4). with positive histological confirmation; (5). T3 or T4; (6). with exact number of nodes examined; (7). adenocarcinoma histology.

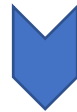

Stage T3-4 without lymph node metastasis  
(n=44537)

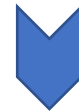

Stage T3-4 with lymph node metastasis  
(n=35759)

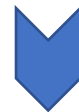

80296 stage II/III colon cancer patients were recruited
